# Supplementary material for: Traditional medicine among the community of Gash-Barka region, Eritrea: attitude, societal dependence, and pattern of use
Source: PubMed Central journal article supplement (PMC7893741; doi:10.1186/s12906-021-03247-9), 2021-02-19
Supplement: 12906_2021_3247_MOESM1_ESM.pdf [file 12906_2021_3247_MOESM1_ESM.pdf]

**THE STATE OF ERITREA**

**MINISTRY OF HEALTH**

**Assessment of Attitude and Pattern of Traditional Medicine Use in the Gash-Barka**

**Community, 2018**

ALL INFORMATION COLLECTED IS CONFIDENTIAL AND IS ONLY FOR STATISTICAL USE

| <b>IDENTIFICATION PARTICULARS</b>          |                      |
|--------------------------------------------|----------------------|
| Zone.....                                  | <input type="text"/> |
| Sub-Zone .....                             | <input type="text"/> |
| Village/Town Name [Urban=1, Rural =2]..... | <input type="text"/> |
| Administration .....                       | <input type="text"/> |
| Cluster No.....                            | <input type="text"/> |
| Household Number.....                      | <input type="text"/> |

|                                                                                                                                                     |                                                                                                                             |
|-----------------------------------------------------------------------------------------------------------------------------------------------------|-----------------------------------------------------------------------------------------------------------------------------|
| Date of interview _____ / _____ / _____                                                                                                             |                                                                                                                             |
| <b>Result Code</b> <input type="checkbox"/>                                                                                                         | 1 = Completed      2 = Partly completed      3 = Refusal converted<br>4 = Refusal      5 = Unable to respond      6 = Other |
| Questionnaire Language <input type="text"/>                                                                                                         | Native Language of Respondent <input type="text"/> Language of Interview <input type="text"/>                               |
| 01= Afar      02= Bilen      03= Bidawiet      04= Kunama      05= Nara<br>06= Arabic      07= Saho      08= Tigre      09= Tigrigna      10= Other |                                                                                                                             |
| <b>Translator used?</b> <input type="checkbox"/>                                                                                                    | 1= Not at all      2= Sometimes      3= All the time                                                                        |

|                                                                    |                                                                   |                                                                     |                                         |
|--------------------------------------------------------------------|-------------------------------------------------------------------|---------------------------------------------------------------------|-----------------------------------------|
| <b>Interviewer's Name &amp; Code</b><br>_____ <input type="text"/> | <b>Supervisor's Name &amp; Code</b><br>_____ <input type="text"/> | <b>Field Editor's Name &amp; Code</b><br>_____ <input type="text"/> | <b>Keyed by</b><br><input type="text"/> |
|--------------------------------------------------------------------|-------------------------------------------------------------------|---------------------------------------------------------------------|-----------------------------------------|

### Demographic Information

| No. | Indicators                                | Coding Categories                                                                                                                                                                                     | Skip |
|-----|-------------------------------------------|-------------------------------------------------------------------------------------------------------------------------------------------------------------------------------------------------------|------|
| 101 | Age of respondent in completed years      | Age <input type="text"/> <input type="text"/>                                                                                                                                                         |      |
| 102 | Year of birth                             | Year <input type="text"/> <input type="text"/> <input type="text"/> <input type="text"/>                                                                                                              |      |
| 103 | Sex                                       | Male ..... 1<br>Female..... 2                                                                                                                                                                         |      |
| 104 | Ethnicity                                 | Tigrina ..... 1<br>Saho ..... 2<br>Kunama ..... 3<br>Bilen ..... 4<br>Rashida ..... 5<br>Tigre ..... 6<br>Afar ..... 7<br>Hidareb ..... 8<br>Nara ..... 9<br>Other ( <i>please specify</i> ) ..... 10 |      |
| 105 | Religion                                  | Christian ..... 1<br>Muslim ..... 2<br>Animist ..... 3<br>Other ( <i>please specify</i> ) ..... 4                                                                                                     |      |
| 106 | Languages<br>( <i>you are fluent in</i> ) | Tigrina .....A<br>Saho .....B<br>Kunama .....C<br>Bilen .....D<br>Arabic .....E<br>Tigre .....F<br>Afar .....G<br>Bidawiet .....H<br>Nara .....I<br>Other ( <i>please specify</i> ) .....J            |      |
| 107 | Level of education                        | None ..... 1<br>Primary school ..... 2<br>Middle school ..... 3<br>Secondary school ..... 4<br>Higher education..... 5                                                                                |      |
| 108 | Marital status                            | Married ..... 1<br>Separated/Divorced ..... 2<br>Widowed ..... 3<br>Not married, but living together..... 4<br>Single ..... 5                                                                         |      |
| 109 | Main occupation                           | _____                                                                                                                                                                                                 |      |
| 110 | Family size                               | <input type="text"/> <input type="text"/>                                                                                                                                                             |      |
| 111 | Family income per month                   | _____                                                                                                                                                                                                 |      |

**KAP of Traditional Medicine**

| No.  | Indicators                                                                                    | Coding Categories                                                                                                                                                                                           | Skip                    |
|------|-----------------------------------------------------------------------------------------------|-------------------------------------------------------------------------------------------------------------------------------------------------------------------------------------------------------------|-------------------------|
| 201  | Have you ever heard about Traditional Medicine (TM)?                                          | Yes..... 1<br>No .....2                                                                                                                                                                                     | <b>END OF INTERVIEW</b> |
| 202  | What is your primary source of healthcare services?                                           | Traditional Medicine ..... 1<br>Conventional Medicine.....2<br>Both .....3                                                                                                                                  |                         |
| 203  | Is there a Traditional Medicine Practitioners (TMPs) in your area?                            | Yes..... 1<br>No .....2<br>Don't know .....3                                                                                                                                                                | <b>205</b>              |
| 203A | Give names of TMP(s) <i>(if willing)</i> :                                                    | _____<br>_____<br>_____                                                                                                                                                                                     |                         |
| 204  | Which ones do you know?<br><i>Multiple answers are possible</i>                               | Herbalists .....A<br>Bone-setters .....B<br>Exorcists .....C<br>Witch doctors .....D<br>Circumcisers .....E<br>Blood letter .....F<br>Massager .....G<br>TBA .....H<br>Other <i>(please specify)</i> .....X |                         |
| 205  | Do you think TMPs are popular in your area?                                                   | Yes..... 1<br>No .....2                                                                                                                                                                                     |                         |
| 206  | TM is cheap and accessible.                                                                   | Strongly Agree..... 1<br>Agree .....2<br>Neutral .....3<br>Disagree .....4<br>Strongly disagree .....5                                                                                                      |                         |
| 207  | Have you come across patients who visited modern health care service soon after visiting TMP? | Yes..... 1<br>No .....2                                                                                                                                                                                     | <b>209</b>              |
| 208  | Why he/she did so?                                                                            | No improvements ..... A<br>Side effect of the treatment..... B<br>Peer influence ..... C<br>Don't know ..... D<br>Other <i>(please specify)</i> .....X                                                      |                         |
| 209  | What treatment do you consider to be the safest in treating your sick child?                  | Traditional Medicine ..... 1<br>Conventional Medicine.....2<br>Both .....3                                                                                                                                  |                         |
| 210  | Do you think there are potential risks that TM imposes on a child's health?                   | Yes..... 1<br>No .....2<br>Depends .....3<br>Don't know .....4                                                                                                                                              |                         |

| No.  | Indicators                                                                                                          | Coding Categories                                                                                                                                                                                    | Skip  |
|------|---------------------------------------------------------------------------------------------------------------------|------------------------------------------------------------------------------------------------------------------------------------------------------------------------------------------------------|-------|
| 211  | Do you agree with your community's support of TM practices?                                                         | Strongly Agree ..... 1<br>Agree ..... 2<br>Neutral ..... 3<br>Disagree ..... 4<br>Strongly Disagree ..... 5                                                                                          |       |
| 212  | How often do you visit a TMP (if you have before)?<br><i>Multiple answers are possible</i>                          | Every time I get sick ..... A<br>Whenever my case is said untreatable by conventional medicine ..... B<br>Whenever I'm far from the conventional medicine ..... C<br>Rarely ..... D<br>Never ..... E | → 217 |
| 213  | Have you visited a TMP in this year?                                                                                | Yes ..... 1<br>No ..... 2                                                                                                                                                                            | → 214 |
| 213A | How many times have you been?                                                                                       | <input type="text"/> <input type="text"/>                                                                                                                                                            |       |
| 214  | What was the outcome of your treatment, in your most recent visit, to a TMP?                                        | Improved ..... 1<br>Exacerbated ..... 2<br>No change ..... 3<br>Cannot recall ..... 4                                                                                                                |       |
| 215  | Have you encountered treatment complications or adverse events from a therapy you received from traditional healer? | Yes ..... 1<br>No ..... 2                                                                                                                                                                            |       |
| 215A | Specify (if yes):                                                                                                   | _____<br>_____                                                                                                                                                                                       |       |
| 216  | How satisfied are you with the treatment you receive from the traditional healers you visited?                      | Wholly satisfied ..... 1<br>Partially satisfied ..... 2<br>Not satisfied ..... 3                                                                                                                     |       |
| 217  | Do you plan to use TM in the future?                                                                                | Yes ..... 1<br>No ..... 2                                                                                                                                                                            |       |
| 217A | If No, reason(s) why?                                                                                               | _____<br>_____                                                                                                                                                                                       |       |
| 218  | Do you encourage others to use TM?                                                                                  | Yes ..... 1<br>No ..... 2                                                                                                                                                                            |       |
| 218A | If Yes, specify why?                                                                                                | _____<br>_____                                                                                                                                                                                       |       |
| 219  | Have you sought protection for (yourself/children) from evil eye via TM?                                            | Yes ..... 1<br>No ..... 2                                                                                                                                                                            |       |
| 220  | Do you use TM for your child to induce diarrhea and/or vomiting for "cleansing purposes"?                           | Yes ..... 1<br>No ..... 2                                                                                                                                                                            |       |
| 220A | Specify the kind (if Yes):                                                                                          | _____<br>_____                                                                                                                                                                                       |       |

| No.  | Indicators                                                                                                                                                      | Coding Categories                                                                                                                                                              | Skip |
|------|-----------------------------------------------------------------------------------------------------------------------------------------------------------------|--------------------------------------------------------------------------------------------------------------------------------------------------------------------------------|------|
| 221  | If your child became sicker while on conventional medicine, what would you do?<br><i>Multiple answers are possible</i>                                          | Stop the medicine .....A<br>Go back to the clinic ..... B<br>Continue until the medication is finished ..... C<br>Go to the traditional healer .....D<br>Other _____X<br>_____ |      |
| 222  | Do you disclose any alternative treatments that you took (or gave your child) to your doctor or other health professional during your visit to health facility? | Yes..... 1<br>No .....2                                                                                                                                                        |      |
| 222A | If <b>No</b> , reason why?                                                                                                                                      | _____<br>_____                                                                                                                                                                 |      |
| 223  | If you were asked would you talk to them about it?                                                                                                              | Yes..... 1<br>No .....2                                                                                                                                                        |      |
| 224  | Do you believe that traditional healers are knowledgeable of their practices?                                                                                   | Strongly Agree .....1<br>Agree .....2<br>Neutral .....3<br>Disagree .....4<br>Strongly Disagree .....5                                                                         |      |
| 225  | Do you use traditional remedies at home?                                                                                                                        | Yes..... 1<br>No .....2                                                                                                                                                        | 230  |
| 226  | What were the main sources of supply for your traditional remedies/products?                                                                                    | From Practitioners .....A<br>Neighbours ..... B<br>Relatives ..... C<br>Friends .....D<br>Acquired it myself ..... E<br>Other _____X<br>_____                                  |      |
| 227  | What formulations of TM were taken?                                                                                                                             | Ingestible/powder form .....A<br>Drinkable/liquid form ..... B<br>Ointment ..... C<br>Other _____X<br>_____                                                                    |      |
| 228  | Can you give some examples along with the disease conditions you use it for?                                                                                    | _____<br>_____<br>_____<br>_____                                                                                                                                               |      |
| 229  | Do you think there are diseases that cannot be cured by modern medicine but can be by TM?                                                                       | Yes..... 1<br>No .....2<br>Don't know.....3                                                                                                                                    |      |
| 229A | Mention some of the diseases along with their cures:                                                                                                            | _____<br>_____<br>_____                                                                                                                                                        |      |

| No. | Indicators                                                                     | Coding Categories                                                                                                                                                                                                                                                                                                                                                                                                                     | Skip                              |
|-----|--------------------------------------------------------------------------------|---------------------------------------------------------------------------------------------------------------------------------------------------------------------------------------------------------------------------------------------------------------------------------------------------------------------------------------------------------------------------------------------------------------------------------------|-----------------------------------|
| 230 | Do you prefer to receive treatments from TM to conventional medicine?          | Always ..... 1<br>Sometimes ..... 2<br>Only for some conditions ..... 3<br>Never ..... 4                                                                                                                                                                                                                                                                                                                                              |                                   |
| 231 | What are your preferences in picking a particular TMP over another?            | Nature of my illness ..... A<br>Cost ..... B<br>Accessibility (near to my area) ..... C<br>Religious/cultural ..... D<br>Popularity of the TMP ..... E<br>Other ..... X<br>_____                                                                                                                                                                                                                                                      |                                   |
| 232 | Why do you think people visit TMP?<br><i>Multiple answers are possible</i>     | When they are told that their case cannot be treated with conventional medicine ..... A<br>They believe that TM is more effective & safer than conventional medicine ..... B<br>TM is more affordable than conventional medicine ..... C<br>TM is more accessible than conventional medicine ..... D<br>Religious or cultural conviction ..... E<br>Fear of side effects from conventional medicine ..... F<br>Other ..... X<br>_____ |                                   |
| 233 | Do have children under 15 years in the household?                              | Yes ..... 1<br>No ..... 2                                                                                                                                                                                                                                                                                                                                                                                                             | 238                               |
| 234 | Are the children (in the household) circumcised?<br>a) Male(s)<br>b) Female(s) | <b>Yes</b> <b>No</b><br>a) Male(s)      1 ..... 2<br>b) Female(s)      1 ..... 2                                                                                                                                                                                                                                                                                                                                                      | <i>If No for both skip to 235</i> |
| 235 | Where the children (in the household) have undertaken such procedure?          | Modern health facility ..... 1<br>Traditional circumciser ..... 2<br>Other ..... X<br>_____                                                                                                                                                                                                                                                                                                                                           |                                   |
| 236 | Have you undertaken uvulectomy in your childhood?                              | Yes ..... 1<br>No ..... 2                                                                                                                                                                                                                                                                                                                                                                                                             | 238                               |
| 237 | Where have you undertaken such procedure?                                      | Modern health facility ..... 1<br>Traditional uvulectomist ..... 2<br>Other ..... X<br>_____                                                                                                                                                                                                                                                                                                                                          |                                   |
| 238 | Do you believe TM practices should be stopped?                                 | Strongly Agree ..... 1<br>Agree ..... 2<br>Neutral ..... 3<br>Disagree ..... 4<br>Strongly Disagree ..... 5                                                                                                                                                                                                                                                                                                                           |                                   |

**Thank you for completing the interview!**
